# Supplementary material
Source: PubMed Central journal article supplement (PMC3311780)
Supplement: NIHMS353256-supplement-1.pdf [file NIHMS353256-supplement-1.pdf]

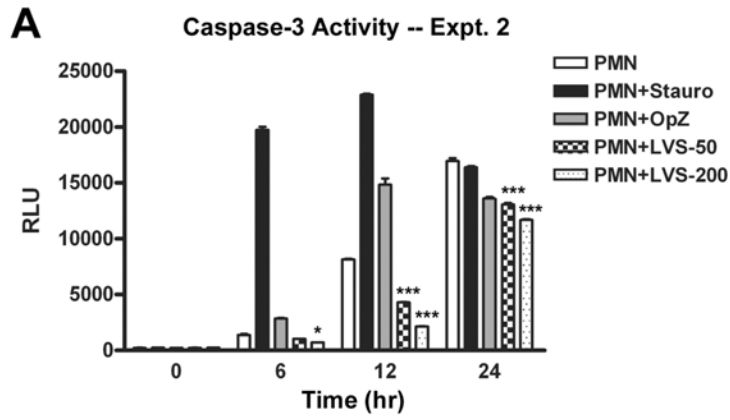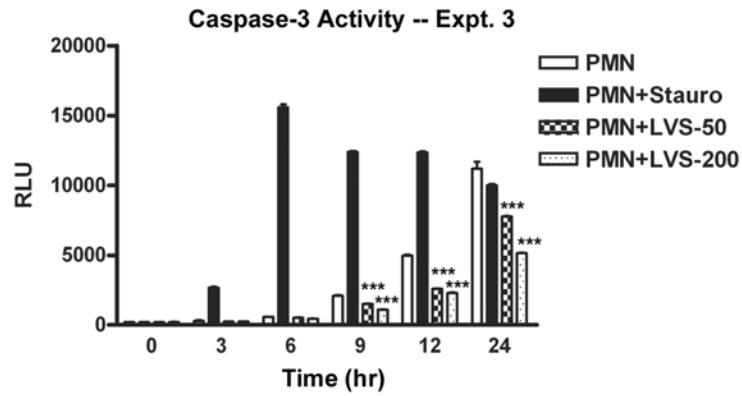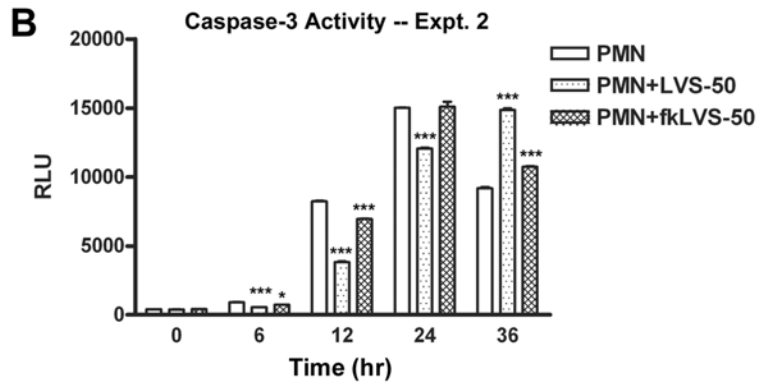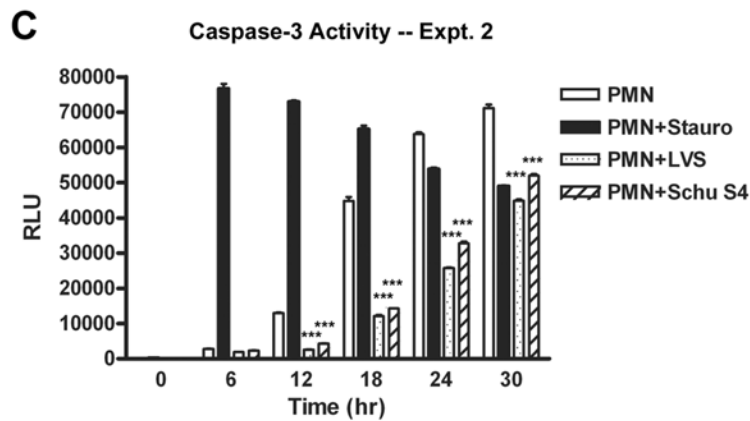

**SUPPLEMENTAL FIGURE 1.** Caspase-3 activity measured using PMNs from additional donors. **A**, Data obtained using PMN from two additional donors demonstrate that staurosporine (1  $\mu$ M) and OpZ (5:1) accelerate caspase-3 activation relative to untreated controls, whereas LVS (at MOI 50:1 or 200:1) impairs this process.  $*P < 0.05$  and  $***P < 0.001$  for LVS vs. control PMNs. **B**, Relative effects of live and formalin-killed LVS (each at MOI 50:1) on caspase-3 activation.  $*P < 0.05$ ,  $***P < 0.001$ . **C**, Cells from another donor confirm the ability of Schu S4 and LVS at MOI 200:1 to inhibit caspase-3 activation in PMN. In contrast, PMN caspase-3 activation was accelerated by 1  $\mu$ M staurosporine.  $***P < 0.001$  for Schu S4 and LVS vs. PMN control.
